# Supplementary material for: A polymorphism of HMGA1 is associated with increased risk of metabolic syndrome and related components
Source: PubMed Central journal article supplement — Sci Rep. 2013 Mar 20;3:1491. doi: 10.1038/srep01491 (PMC3603272; doi:10.1038/srep01491), 2013-03-20
Supplement: srep01491-s1.pdf [file srep01491-s1.pdf]

## Supplemental Data

---

### **A polymorphism of *HMGAI* is associated with increased risk of metabolic syndrome and related components**

Eusebio Chiefari, Sinan Tanyolaç, Stefania Iiritano, Angela Sciacqua, Carmelo Capula, Biagio Arcidiacono, Aurora Nocera, Katuscia Possidente, Francesco Baudi, Valeria Ventura, Giuseppe Brunetti, Francesco S. Brunetti, Raffaella Vero, Raffaele Maio, Manfredi Greco, Maria Pavia, Ugur Hodoglugil, Vincent Durlach, Clive R. Pullinger, Ira D. Goldfine, Francesco Perticone, Daniela Foti & Antonio Brunetti.

---

#### **Contents:**

Supplementary Table S1

Supplementary Table S2

**Supplementary Table S1.** General Characteristics of the Two Study Populations With or Without MetS

| <b>Italian population</b>             | <b>Units</b> | <b>MetS</b>   | <b>Control</b> | <b>P</b> |
|---------------------------------------|--------------|---------------|----------------|----------|
| Number of subjects                    | n            | 3405          | 5016           |          |
| Female/Male                           | n            | 1,767/1,638   | 2581/2,435     |          |
| Increased waist circumference         |              |               |                |          |
| Female (>88 cm)                       | n (%)        | 1,165 (65.9)  | 455 (17.6)     | < 0.001  |
| Male (>102 cm)                        | n (%)        | 897 (54.8)    | 262 (10.8)     | < 0.001  |
| BP ≥130/85 mmHg or therapy            |              |               |                |          |
| Female                                | n (%)        | 1,522 (86.1)  | 361 (14.0)     | < 0.001  |
| Male                                  | n (%)        | 1,392 (85.0)  | 435 (17.9)     | < 0.001  |
| Low HDL-C or therapy                  |              |               |                |          |
| Female (<50 mg/dL)                    | n (%)        | 1,335 (75.6)  | 235 (9.1)      | < 0.001  |
| Male (<40 mg/dL)                      | n (%)        | 1,082 (66.1)  | 129 (5.3)      | < 0.001  |
| Triglyceridemia ≥150 mg/dl or therapy |              |               |                |          |
| Female                                | n (%)        | 902 (51.0)    | 91 (3.5)       | < 0.001  |
| Male                                  | n (%)        | 1,041 (63.6)  | 107 (4.4)      | < 0.001  |
| FPG ≥110 mg/dL                        |              |               |                |          |
| Female                                | n (%)        | 1,591 (90.0)  | 799 (31.0)     | < 0.001  |
| Male                                  | n (%)        | 1,465 (89.4)  | 840 (34.5)     | < 0.001  |
| MetS components (NCEP ATP III)        |              |               |                |          |
| No component                          | n (%)        | –             | 2569 (51.2)*   | –        |
| One component                         | n (%)        | –             | 1179 (23.5)*   | –        |
| Two components                        | n (%)        | –             | 1268 (25.3)*   | –        |
| Three components                      | n (%)        | 1,817 (53.4)* | –              | –        |
| Four components                       | n (%)        | 998 (29.3)*   | –              | –        |
| Five components                       | n (%)        | 590 (17.3)*   | –              | –        |
| <b>Turkish population</b>             | <b>Units</b> | <b>MetS</b>   | <b>Control</b> | <b>P</b> |
| Number of subjects                    | n            | 659           | 760            |          |
| Female/Male                           | n            | 476/183       | 424/336        |          |
| Increased waist circumference         |              |               |                |          |
| Female (>88 cm)                       | n (%)        | 269 (56.5)    | 153 (36.1)     | < 0.001  |
| Male (>102 cm)                        | n (%)        | 171 (93.4)    | 46 (13.7)      | < 0.001  |
| BP ≥130/85 mmHg or therapy            |              |               |                |          |
| Female                                | n (%)        | 235 (49.4)    | 108 (25.5)     | < 0.001  |
| Male                                  | n (%)        | 171 (93.4)    | 83 (24.7)      | < 0.001  |
| Low HDL-C or therapy                  |              |               |                |          |
| Female (<50 mg/dL)                    | n (%)        | 287 (60.3)    | 223 (52.6)     | ns       |
| Male (<40 mg/dL)                      | n (%)        | 174 (95.1)    | 135 (40.2)     | < 0.001  |

|                                             |       |             |             |         |
|---------------------------------------------|-------|-------------|-------------|---------|
| Triglyceridemia $\geq 150$ mg/dL or therapy |       |             |             |         |
| Female                                      | n (%) | 179 (37.6)  | 5 (1.2)     | < 0.001 |
| Male                                        | n (%) | 172 (94.0)  | 2 (0.6)     | < 0.001 |
| FPG $\geq 110$ mg/dL                        |       |             |             |         |
| Female                                      | n (%) | 119 (25.0)  | 0 (0.0)     | < 0.001 |
| Male                                        | n (%) | 150 (82.0)  | 0 (0.0)     | < 0.001 |
| MetS components (NCEP ATP III)              |       |             |             |         |
| No component                                | n (%) | 0           | 205 (27.0)* |         |
| One component                               | n (%) | 0           | 350 (46.0)* |         |
| Two components                              | n (%) | 0           | 205 (27.0)* |         |
| Three components                            | n (%) | 388 (58.9)* | 0           |         |
| Four components                             | n (%) | 190 (28.8)* | 0           |         |
| Five components                             | n (%) | 81 (12.3)*  | 0           |         |

Fisher exact test has been used for comparisons of proportions;  
NCEP ATP III, National Cholesterol Education Program Adult Treatment Panel III;  
BP, blood pressure; HDL-C, high-density lipoprotein-cholesterol; FPG, fasting plasma glucose;  
Values in parentheses are in percent with respect to total females or males, or with respect to total populations\*.

**Supplementary Table S2.** Oligonucleotide sequences of both primers and probes used.

|                            |           |                             |
|----------------------------|-----------|-----------------------------|
| PCR and sequencing primers | Forward   | 5'-TTCTGAGGGGGTGGAAACAG-3'  |
|                            | Reverse   | 5'-AGGGGTAGTCCCATCTCAAGT-3' |
| TaqMan detection primers   | Forward   | 5'-GGGTGGAAACAGGTGATGACT-3' |
|                            | Reverse   | 5'-CGCTGGGCTCCTTCTGTAAA-3'  |
| TaqMan MGB probes          | Wild-type | 5'-TGACTACCCCCTCTGTC-3'     |
|                            | C-Ins     | 5'-TGACTACCCCCTCTGTC-3'     |
